# Supplementary material
Source: Springer Nature journal article supplement (https://www.springermedizin.de/resource/supplementary/12968_2008_38_MOESM4_ESM.pdf/9577844)

A

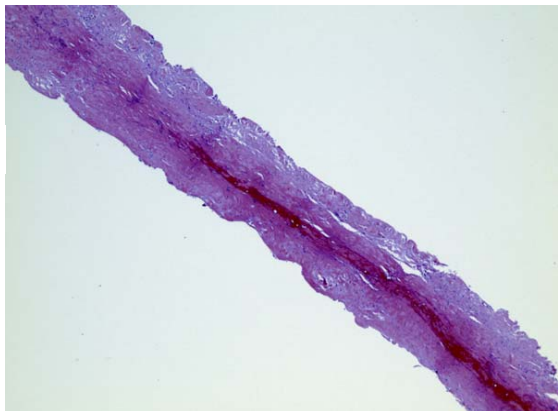

B

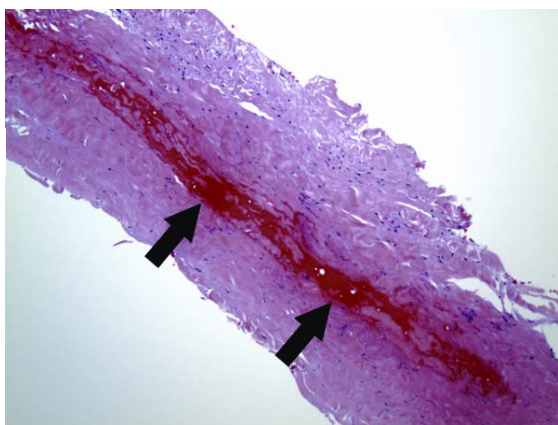

C

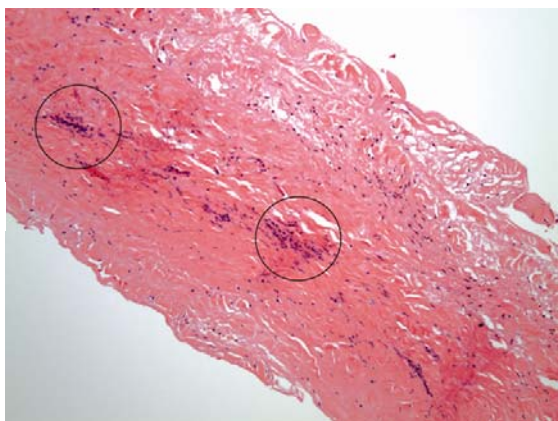

D

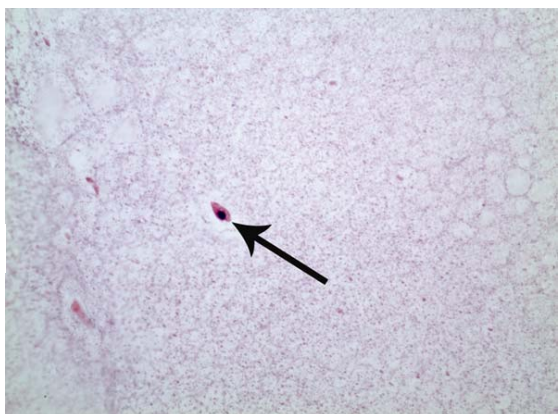

Supplement: MOESM4 [file 9577844]
